# Supplementary material
Source: PubMed Central journal article supplement (PMC4875569)
Supplement: NIHMS776747-supplement-8.pdf [file NIHMS776747-supplement-8.pdf]

# Figure S6

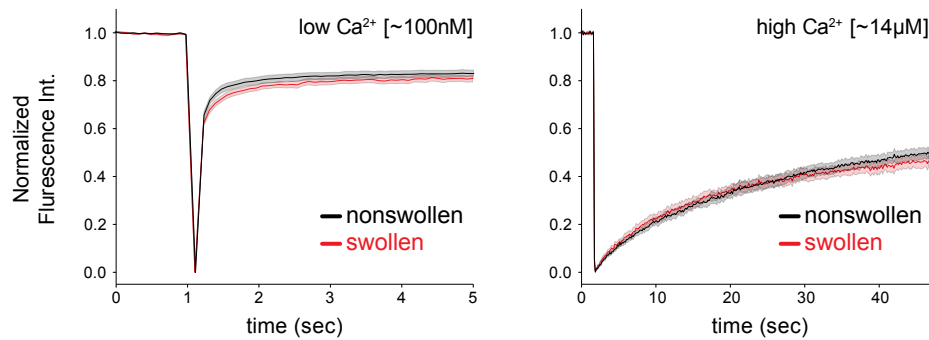

|                                          | <b>nonswollen</b><br>low Ca <sup>2+</sup> [~100nM] | <b>swollen</b> | <b>nonswollen</b><br>high Ca <sup>2+</sup> [~14µM] | <b>swollen</b> |
|------------------------------------------|----------------------------------------------------|----------------|----------------------------------------------------|----------------|
| D <sub>conf</sub> (µm <sup>2</sup> /sec) | 6.67 ± 0.08                                        | 6.57 ± 0.08    | 0.040 ± 0.003                                      | 0.047 ± 0.003  |
| M <sub>f</sub> (%)                       | 83.16 ± 1.55                                       | 80.98 ± 1.17   | 49.65 ± 2.23                                       | 46.32 ± 2.6    |
