# Supplementary material
Source: PubMed Central journal article supplement (PMC4875569)

# Figure S1

## A

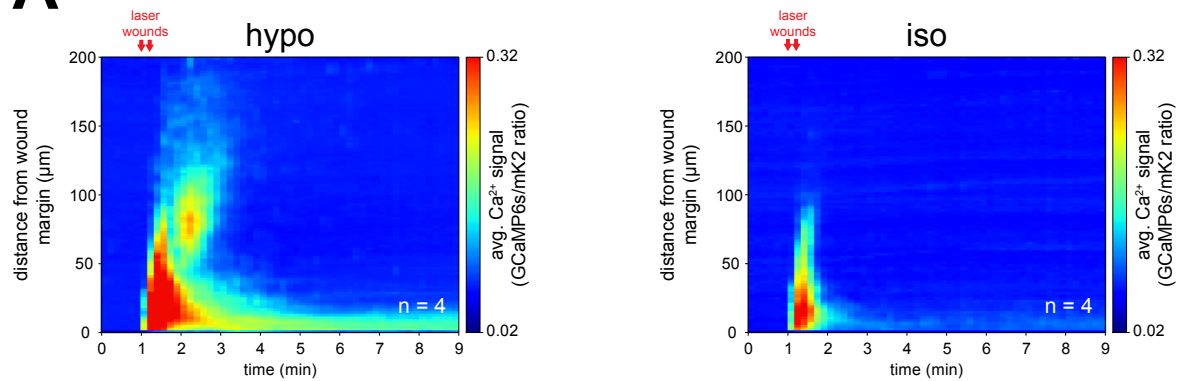

## B

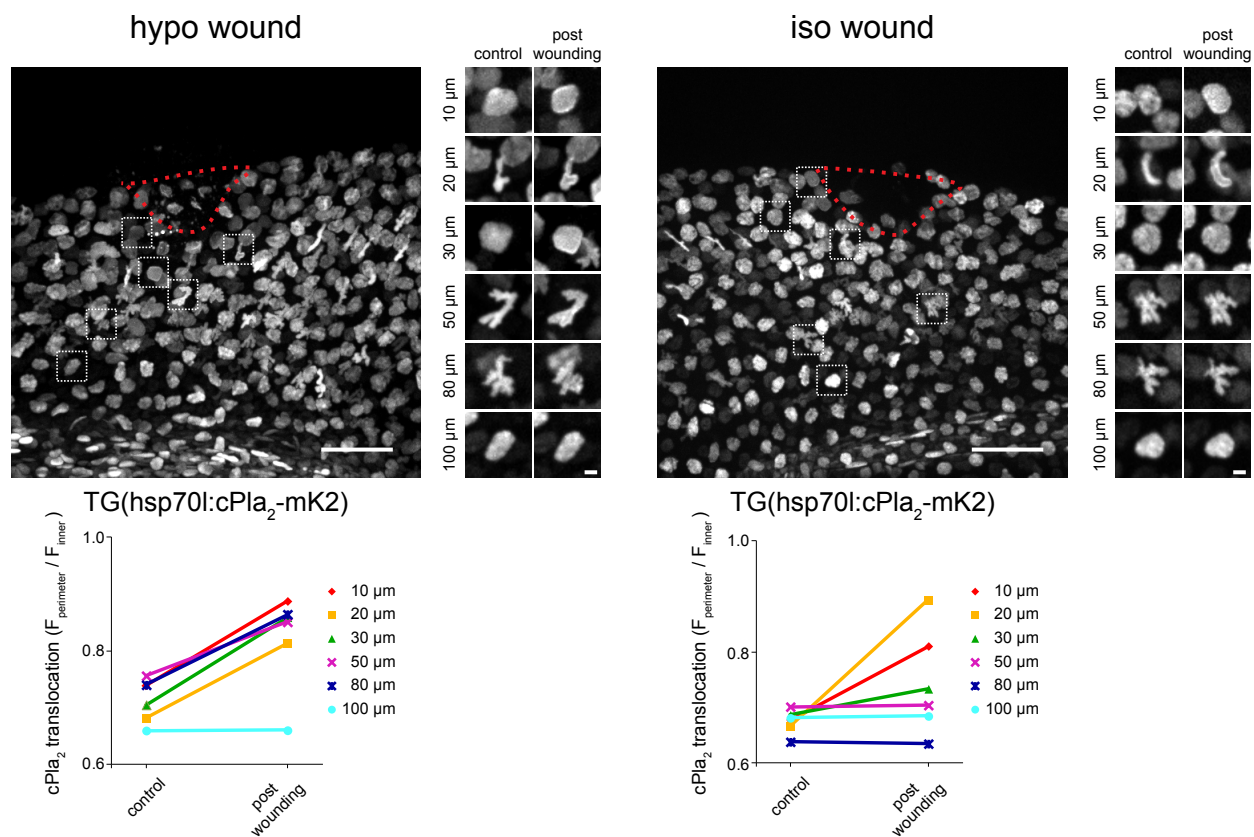

Supplement: NIHMS776747-supplement-3.pdf [file NIHMS776747-supplement-3.pdf]

# Figure S2

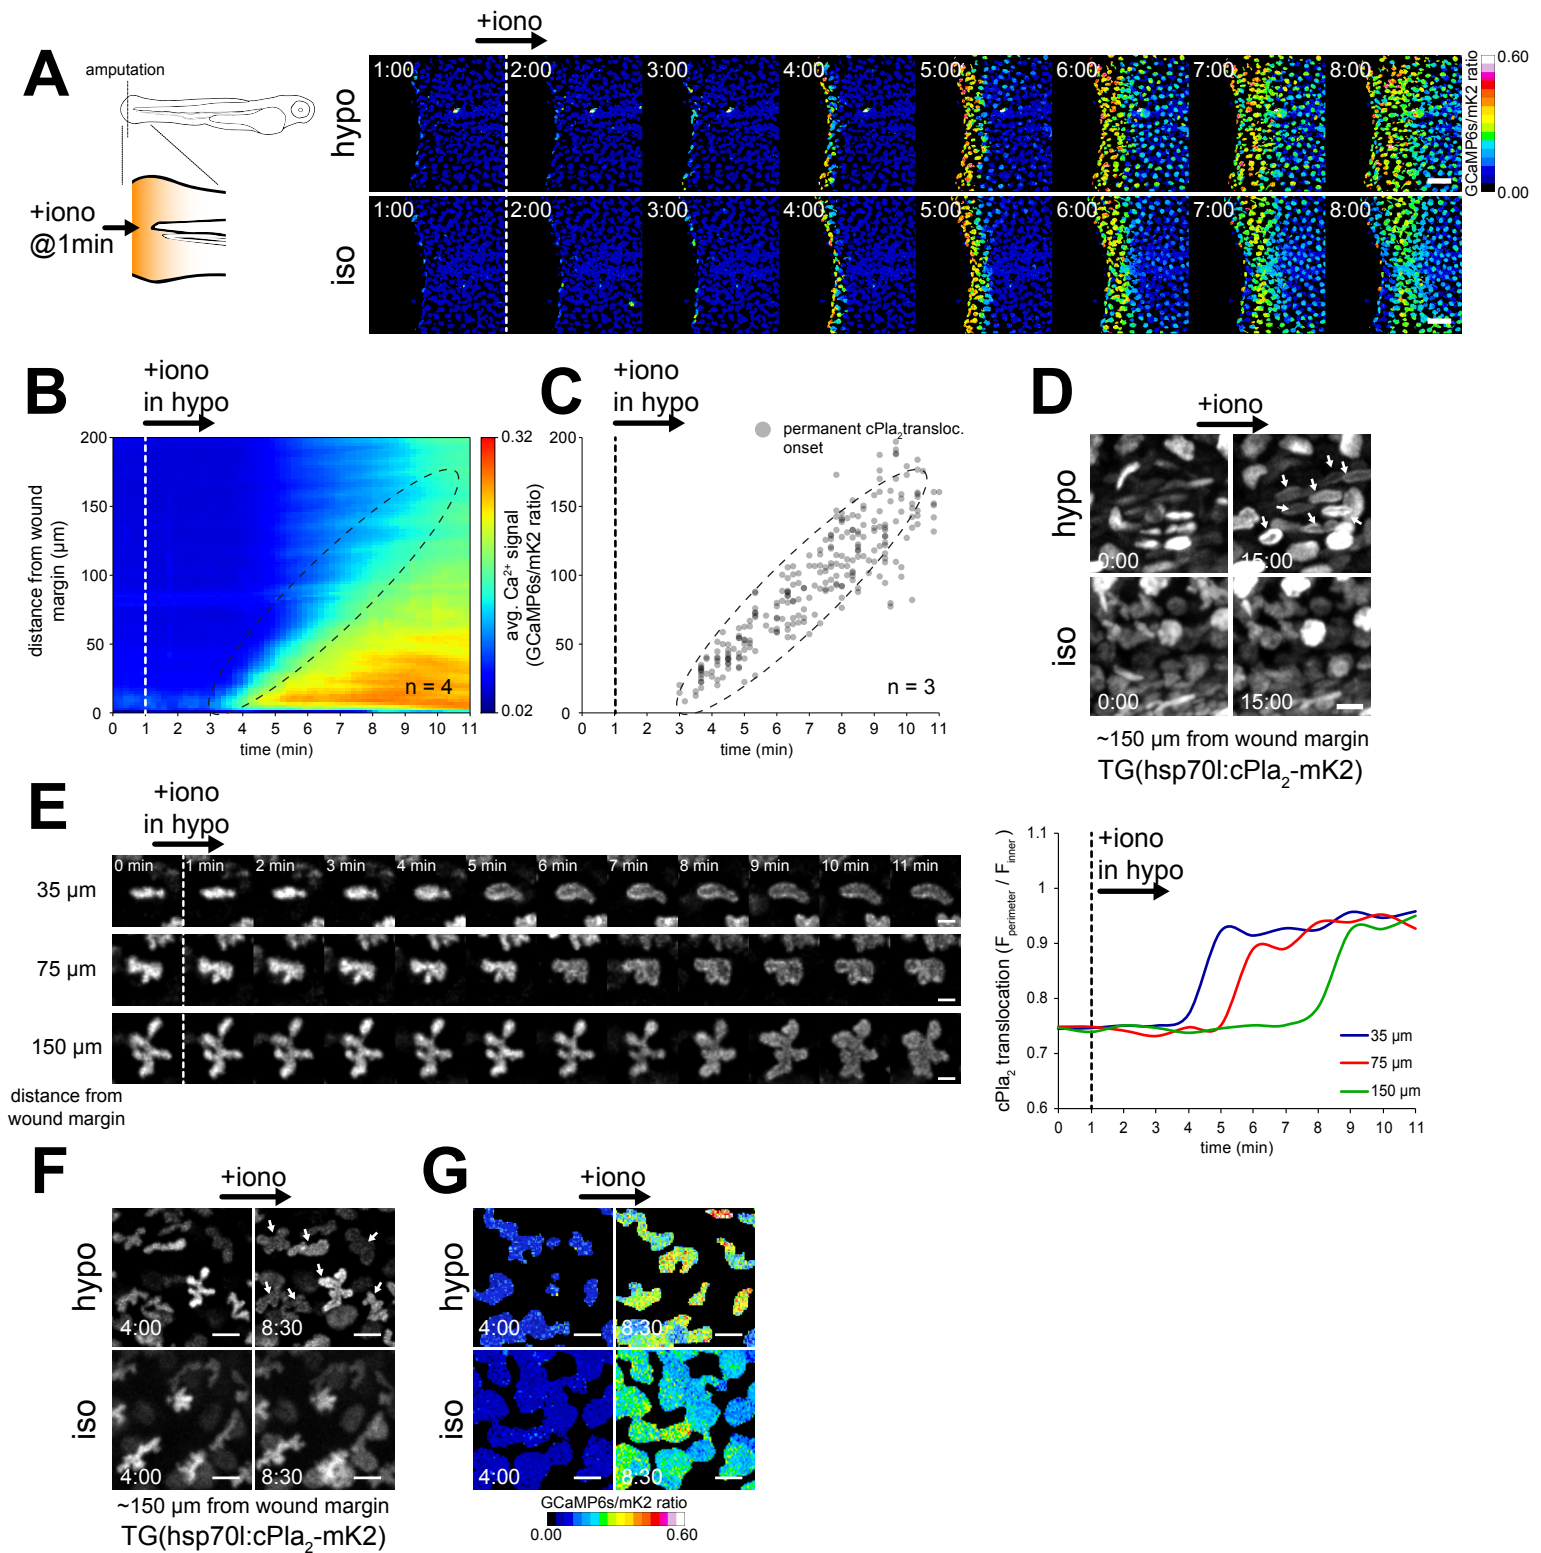

Supplement: NIHMS776747-supplement-4.pdf [file NIHMS776747-supplement-4.pdf]

# Figure S3

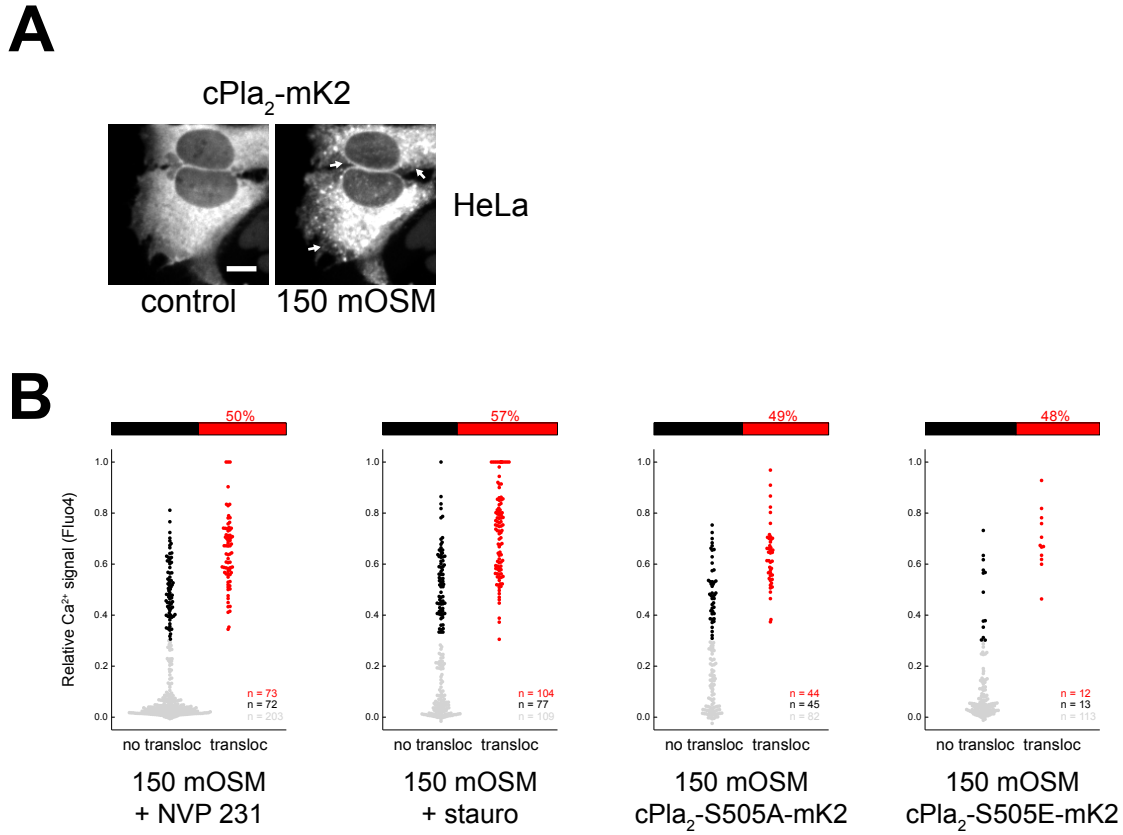

Supplement: NIHMS776747-supplement-5.pdf [file NIHMS776747-supplement-5.pdf]

# Figure S4

## A

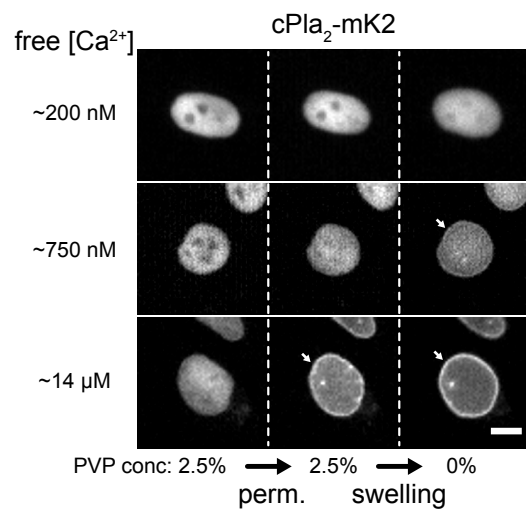

## B

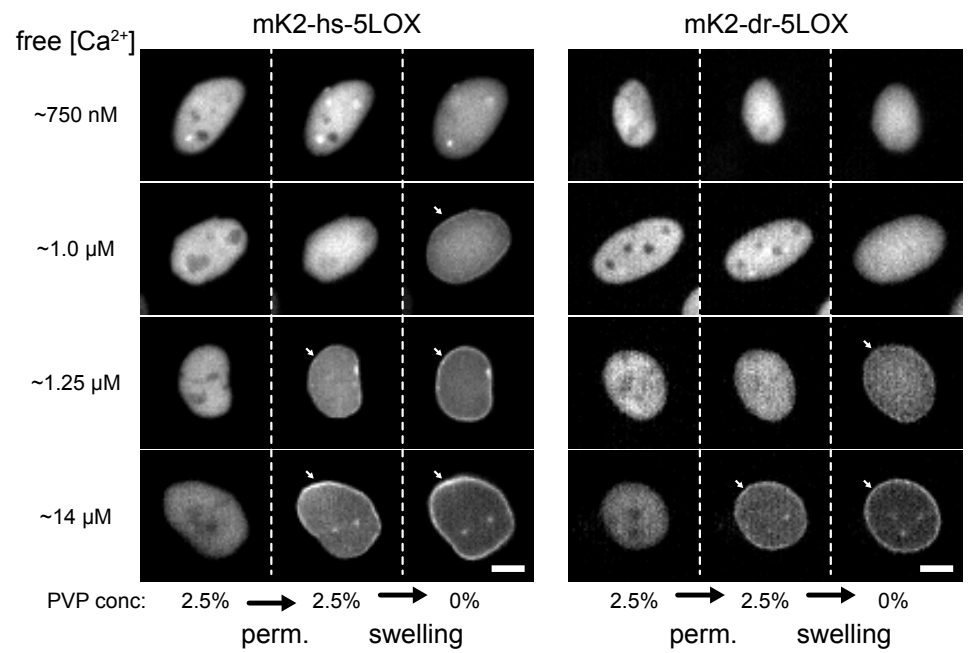

Supplement: NIHMS776747-supplement-6.pdf [file NIHMS776747-supplement-6.pdf]

# Figure S5

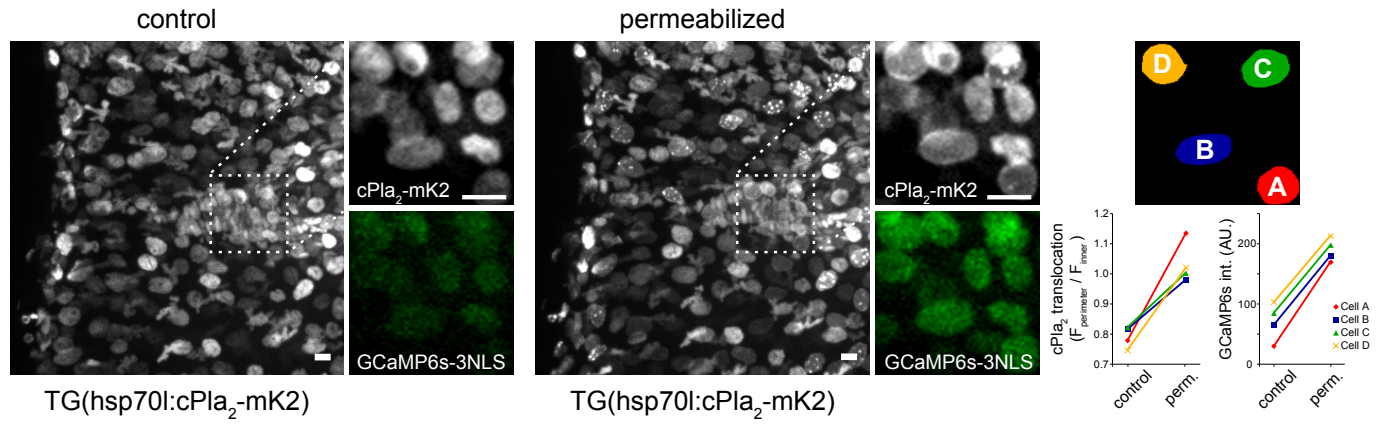

Supplement: NIHMS776747-supplement-7.pdf [file NIHMS776747-supplement-7.pdf]
